# Supplementary material
Source: PubMed Central journal article supplement (PMC3090140)

## Supporting Information for

### Cytotoxic Oleanane-type Saponins from *Albizia inundata*<sup>‡</sup>

Huaping Zhang,<sup>†</sup> Abbas K. Samadi,<sup>‡</sup> Karumanchi V. Rao,<sup>†</sup> Mark S. Cohen<sup>‡</sup>, and Barbara N. Timmermann<sup>\*,†</sup>

*Department of Medicinal Chemistry, School of Pharmacy, University of Kansas, Lawrence, KS 66045 and Department of Surgery, School of Medicine, University of Kansas Medical Center, Kansas City, KS 66160*

<sup>‡</sup>Dedicated to Dr. Koji Nakanishi of Columbia University for his pioneering work on bioactive natural products.

\* Author to whom correspondence should be addressed. Tel: (785)864-4844. Fax: (785)864-5326. Email: [btimmer@ku.edu](mailto:btimmer@ku.edu). (B. N. T.)

<sup>†</sup> University of Kansas.

<sup>‡</sup> University of Kansas Medical Center.

## Table of Contents

S1 Structures of saponins **1-9**

S2 **Table 1** IC<sub>50</sub> values of the extracts, fractions and the saponins **1, 3, 6** and **7** against four cancer cell lines

S3 HRESIMS data of **1** and **2**

S4 <sup>1</sup>H NMR spectrum (500 MHz in C<sub>5</sub>D<sub>5</sub>N) of saponin **1**.

S5 <sup>13</sup>C NMR and DEPT135 spectra (125 MHz in C<sub>5</sub>D<sub>5</sub>N) of saponin **1**

S6 <sup>1</sup>H-<sup>1</sup>H COSY spectrum of saponin **1**

S7 HSQC spectrum of saponin **1**

S8 HMBC spectrum of saponin **1**

S9 TOCSY spectrum of saponin **1**

S10 <sup>1</sup>H NMR spectrum (500 MHz in C<sub>5</sub>D<sub>5</sub>N) of saponin **2**

S11 APT <sup>13</sup>C NMR spectrum of saponin **2**

S12 DQF-COSY spectrum of saponin **2**

S13 HSQC spectrum of saponin **2**

S14 HMBC spectrum of saponin **2**

S15 HSQC-TOCSY spectrum of saponin **2**

S16 <sup>1</sup>H NMR spectrum (500 MHz in C<sub>5</sub>D<sub>5</sub>N) of saponin **3**

S17 <sup>13</sup>C NMR and DEPT135 spectra of saponin **3**

S1 Structures of saponins **1-9**

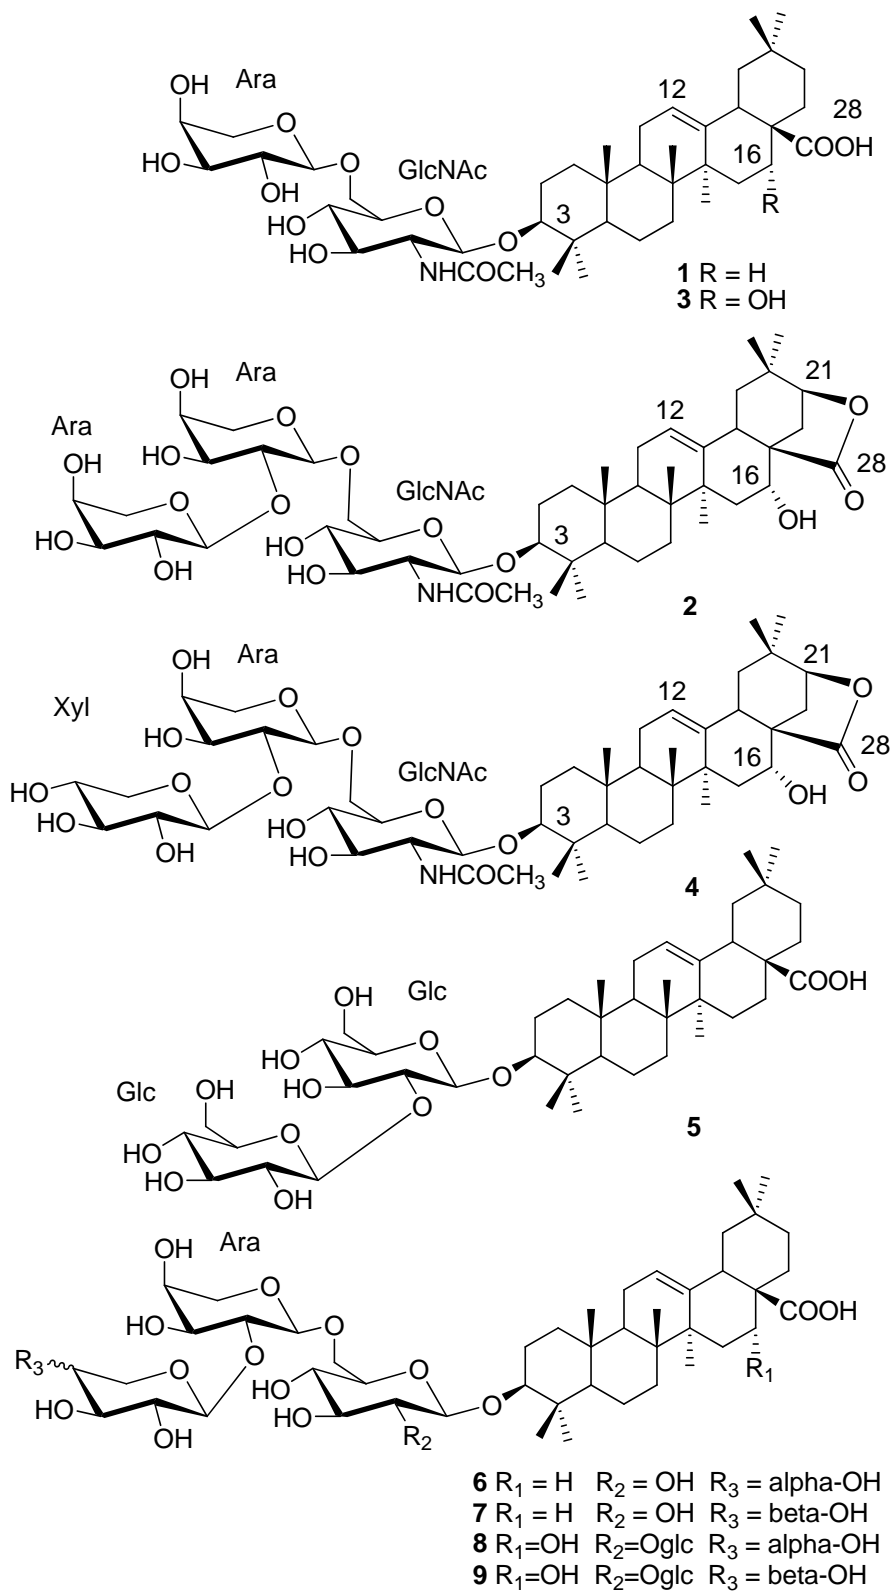

**S2 Table 1** IC<sub>50</sub> values of the extracts, fractions and the saponins **1**, **3**, **6** and **7** against four cancer cell lines

| Extract, fraction or pure saponin                         | B16F10    | JMAR      | MDA 1986  | SKMEL28   |
|-----------------------------------------------------------|-----------|-----------|-----------|-----------|
| Crude CH <sub>2</sub> Cl <sub>2</sub> -MeOH (1:1) extract | 3.7 µg/ml | 1.1 µg/ml | 1.0 µg/ml | 3.8 µg/ml |
| <i>n</i> -BuOH part after partition                       | 1.0 µg/ml | 1.0 µg/ml | 0.1 µg/ml | 1.0 µg/ml |
| Fraction 5 after MCI CHP20P                               | 0.5 µg/ml | 0.1 µg/ml | 0.2 µg/ml | 0.9 µg/ml |
| <b>1</b>                                                  | 4.7 µM    | 8.7 µM    | 7.3 µM    | 12.4 µM   |
| <b>3</b>                                                  | 5.1 µM    | 2.8 µM    | 1.8 µM    | 9.2 µM    |
| <b>6</b>                                                  | 6.9 µM    | 10.1 µM   | 9.0 µM    | 8.6 µM    |
| <b>7</b>                                                  | 6.3 µM    | 11.5 µM   | 8.2 µM    | 8.1 µM    |

**S3 HRESIMS data of 1 and 2**

| Compound <b>1</b>                |                 | Molecular formula C <sub>43</sub> H <sub>69</sub> NO <sub>12</sub> |          |          |          |                    |              |
|----------------------------------|-----------------|--------------------------------------------------------------------|----------|----------|----------|--------------------|--------------|
| Exact Mass [M+H] <sup>+</sup>    | Calcd 792.4898  | 792.4861                                                           | 792.4887 | 792.4877 | 792.4849 | Average 792.48685  | SD 0.0016842 |
| ppm error                        |                 | 4.7                                                                | 1.4      | 2.6      | 6.2      | 3.725              | 2.14         |
| Extract Mass [M+Na] <sup>+</sup> | Calcd 814.4717  | 814.4679                                                           | 814.4700 | 814.4725 | 814.4684 | 814.4697           | 0.0020704    |
| ppm error                        |                 | 4.7                                                                | 2.1      | 1        | 4.1      | 2.975              | 1.72         |
| Compound <b>2</b>                |                 | Molecular formula C <sub>48</sub> H <sub>75</sub> NO <sub>17</sub> |          |          |          |                    |              |
| Exact Mass [M+H] <sup>+</sup>    | Calcd. 938.5113 | 938.507                                                            | 938.5038 | 938.5067 | 938.507  | Average 938.506125 | SD 0.0015564 |
| ppm error                        |                 | 4.6                                                                | 8        | 4.9      | 4.6      | 5.525              | 1.66         |
| Extract Mass [M+Na] <sup>+</sup> | Calcd. 960.4933 | 960.4864                                                           | 960.4908 | 960.4897 | 960.489  | 980.488975         | 0.0018697    |
| ppm error                        |                 | 7.2                                                                | 2.6      | 3.7      | 4.5      | 4.5                | 1.96         |

S4  $^1\text{H}$  NMR spectrum (500 MHz in  $\text{C}_5\text{D}_5\text{N}$ ) of saponin **1**

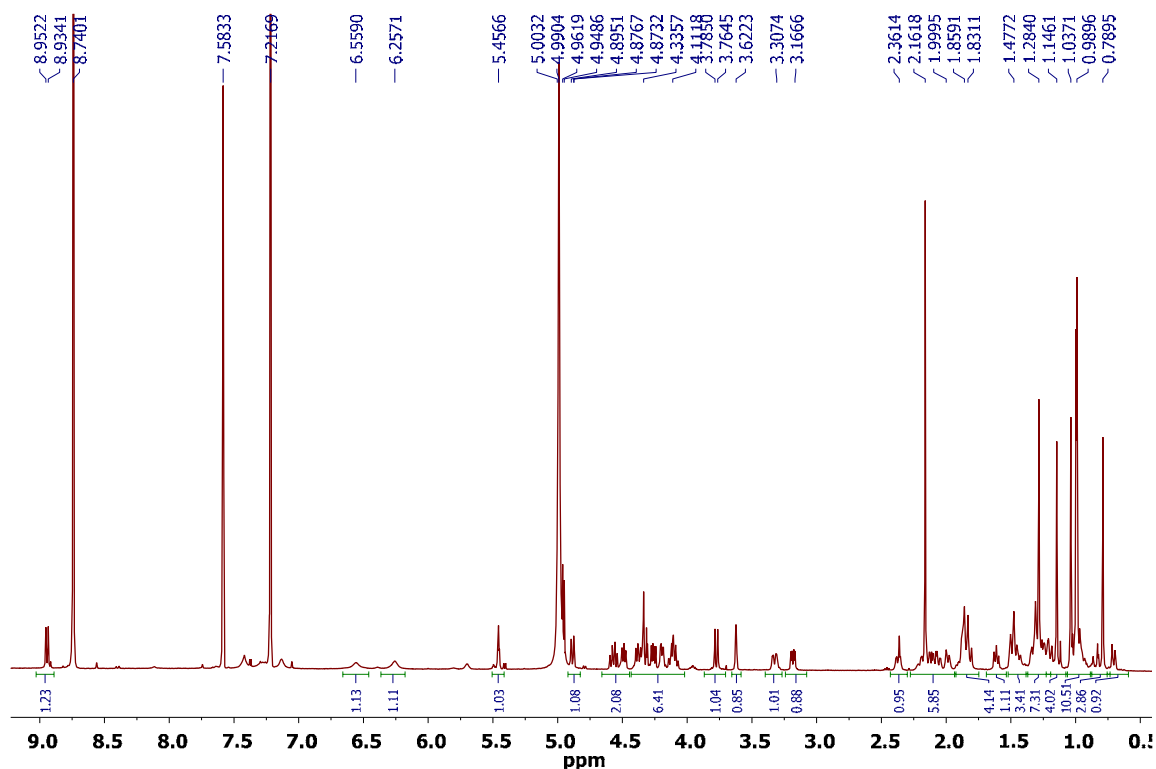

S5  $^{13}\text{C}$  NMR and DEPT135 spectra (125 MHz in  $\text{C}_5\text{D}_5\text{N}$ ) of saponin **1**

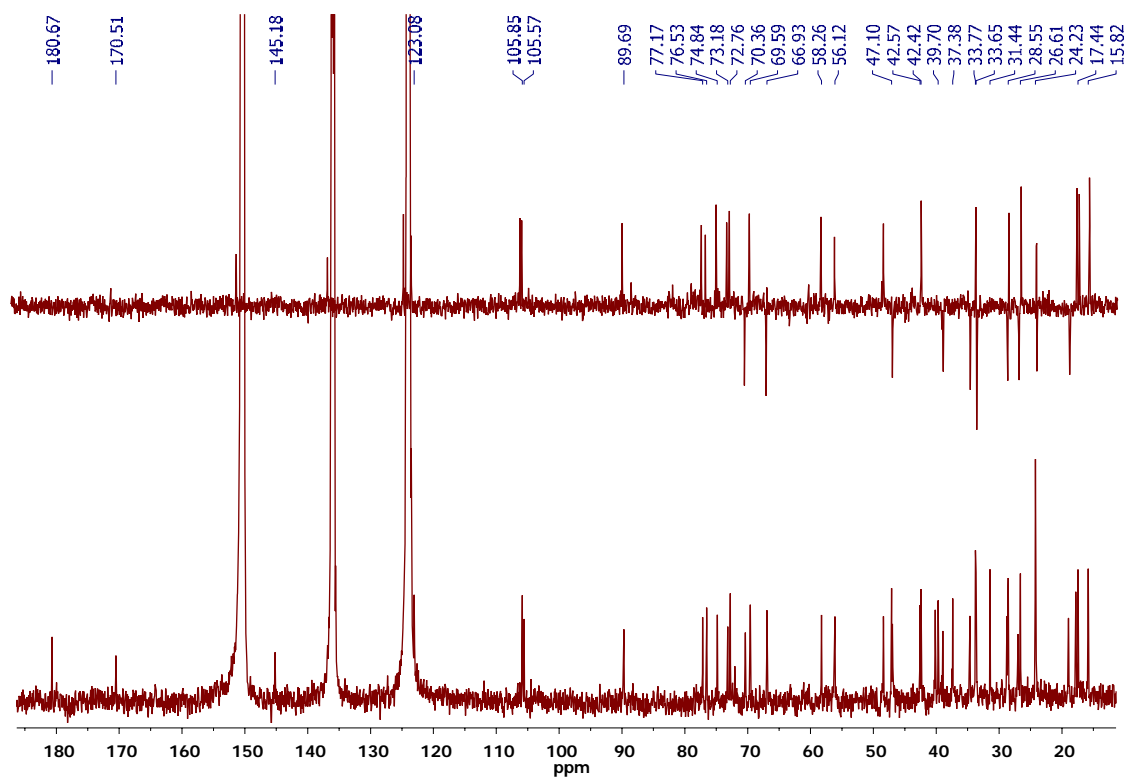

S6  $^1\text{H}$ - $^1\text{H}$  COSY spectrum of saponin **1**

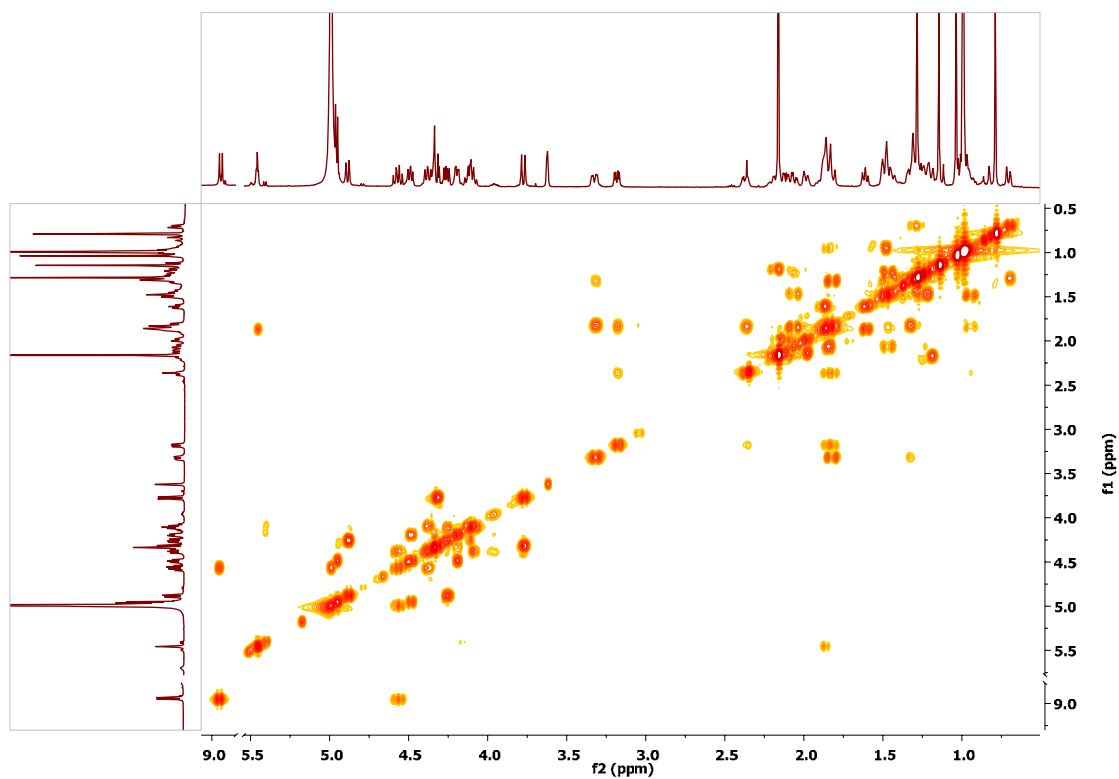

S7 HSQC spectrum of saponin **1**

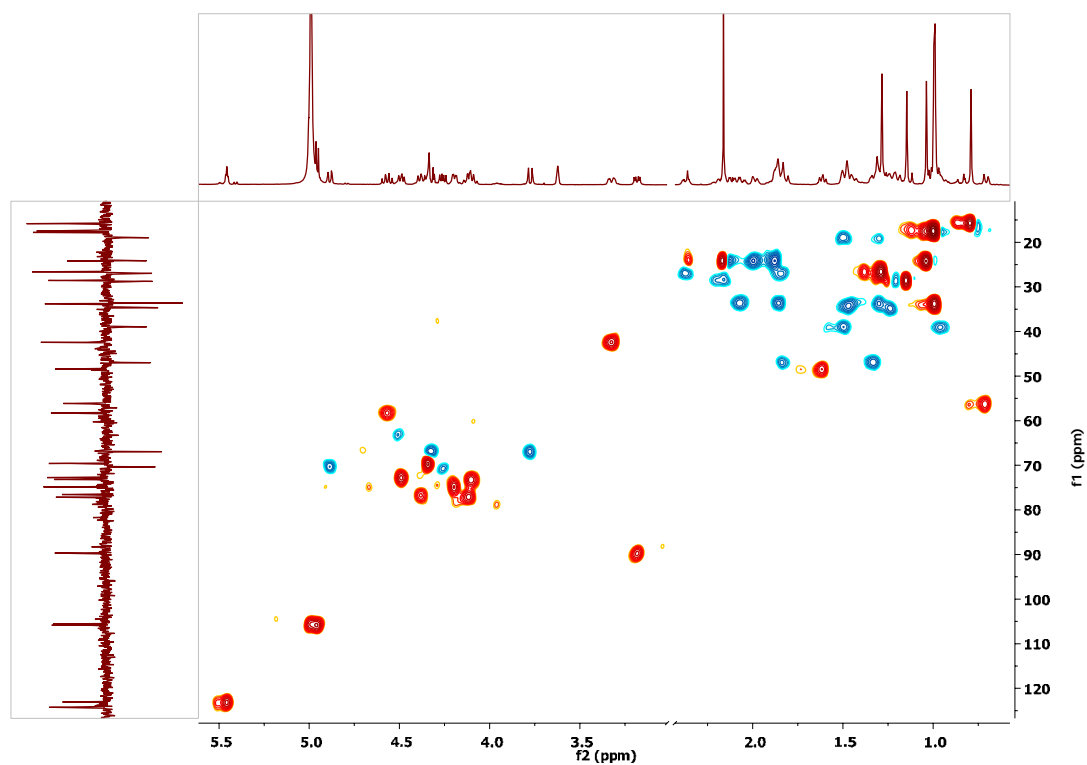

S8 HMBC spectrum of saponin **1**

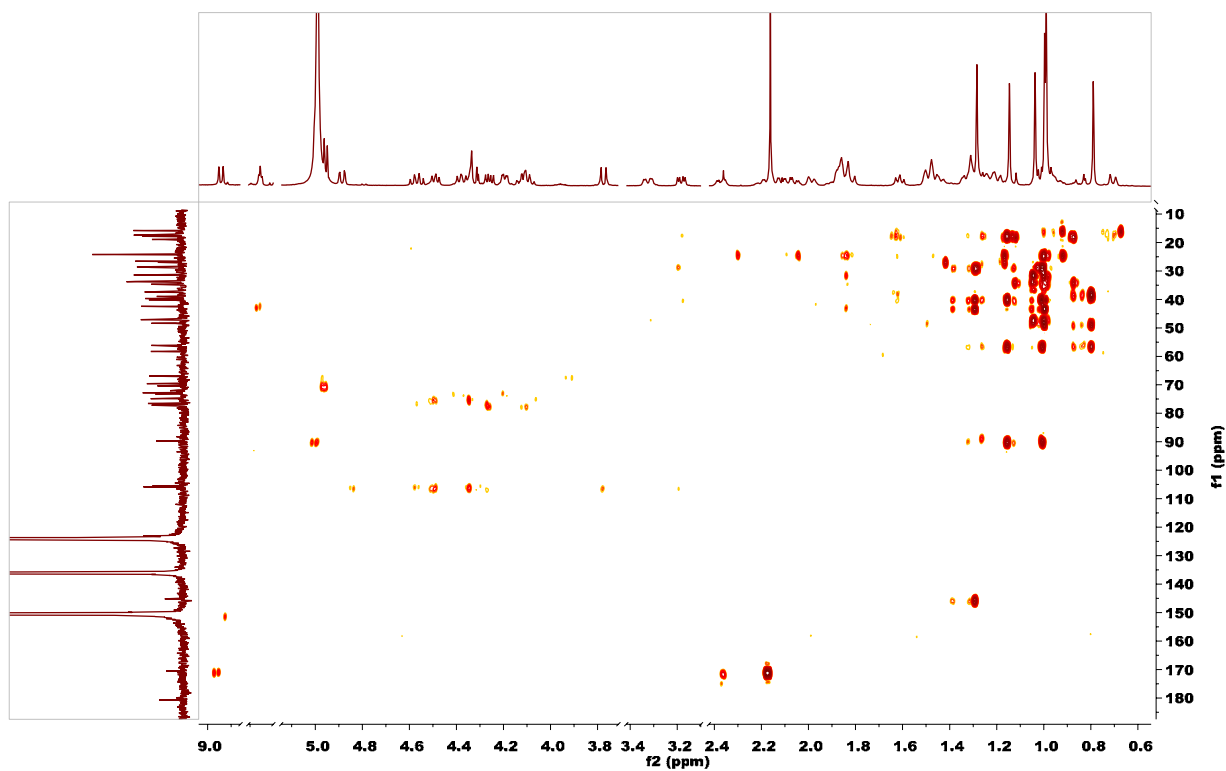

S9 TOCSY spectrum of saponin **1**

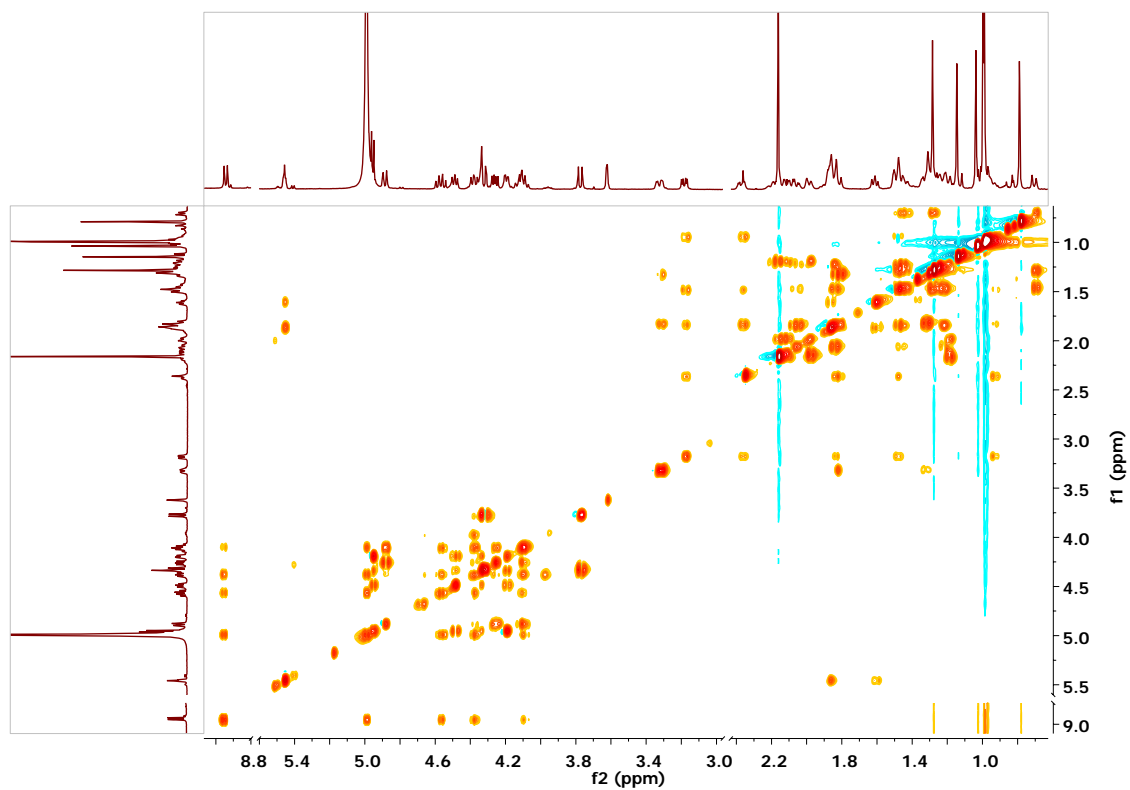

S10  $^1\text{H}$  NMR spectrum (500 MHz in  $\text{C}_5\text{D}_5\text{N}$ ) of saponin **2**

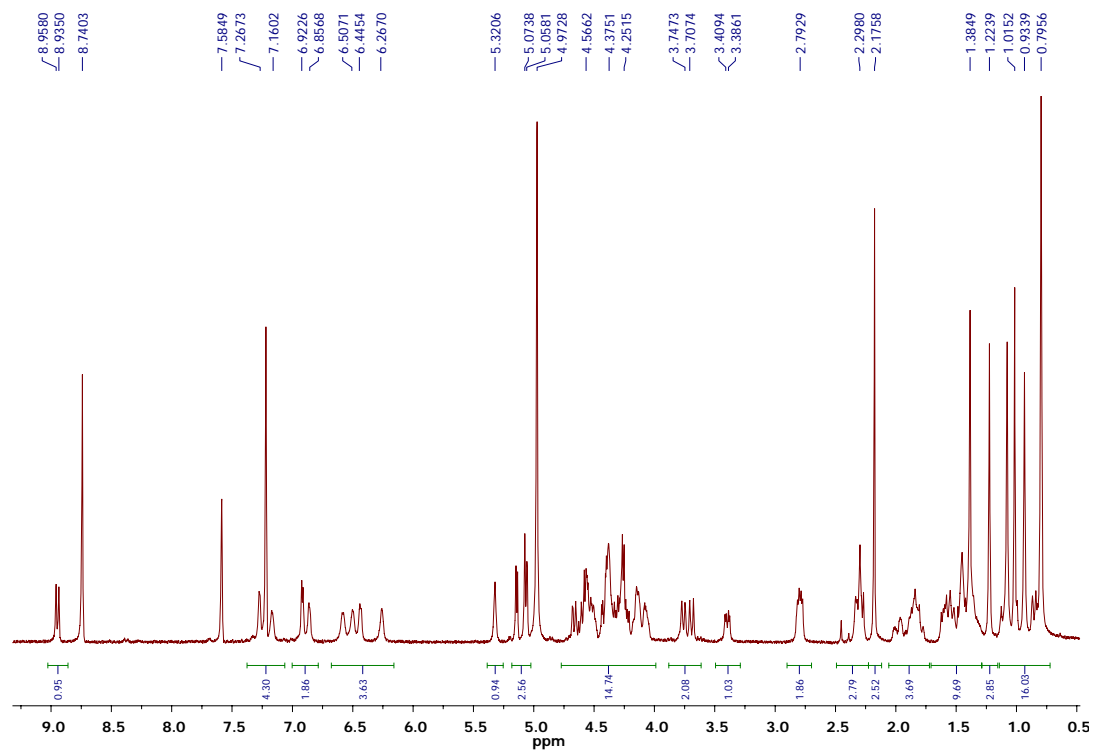

S11 APT  $^{13}\text{C}$  NMR spectrum of saponin **2**

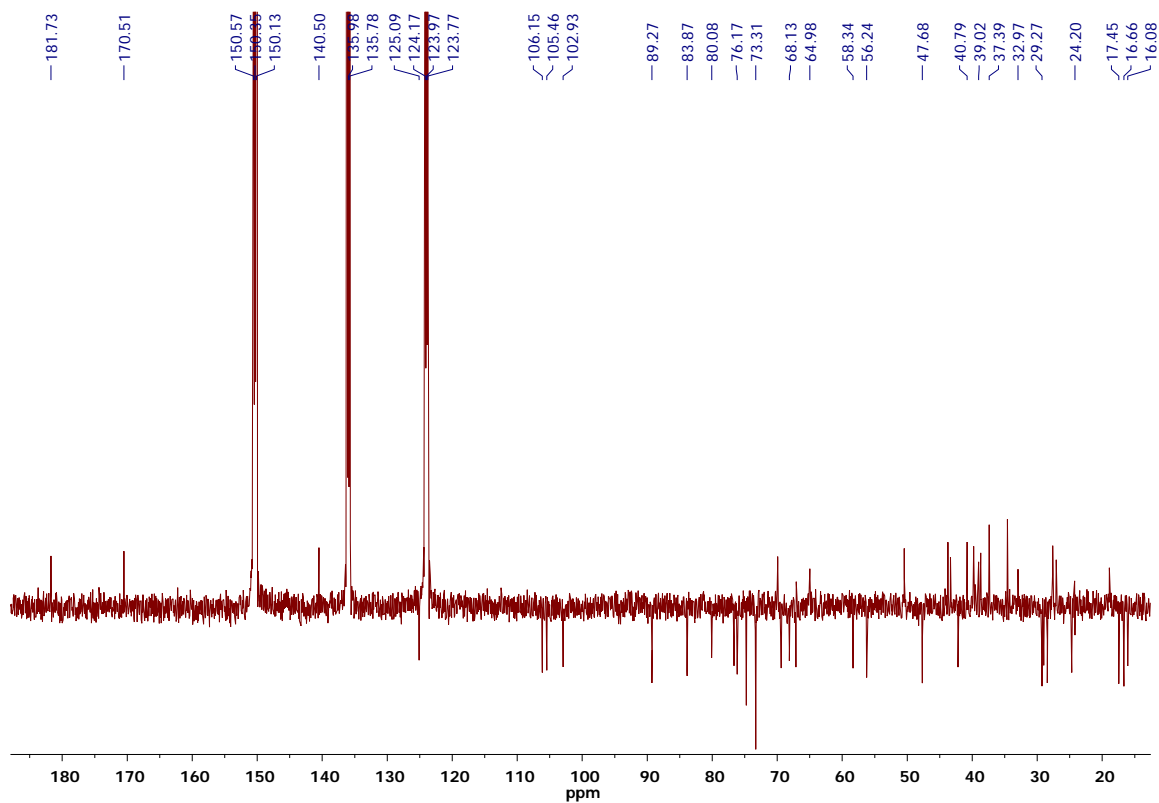



S12 DQF-COSY spectrum of saponin **2**

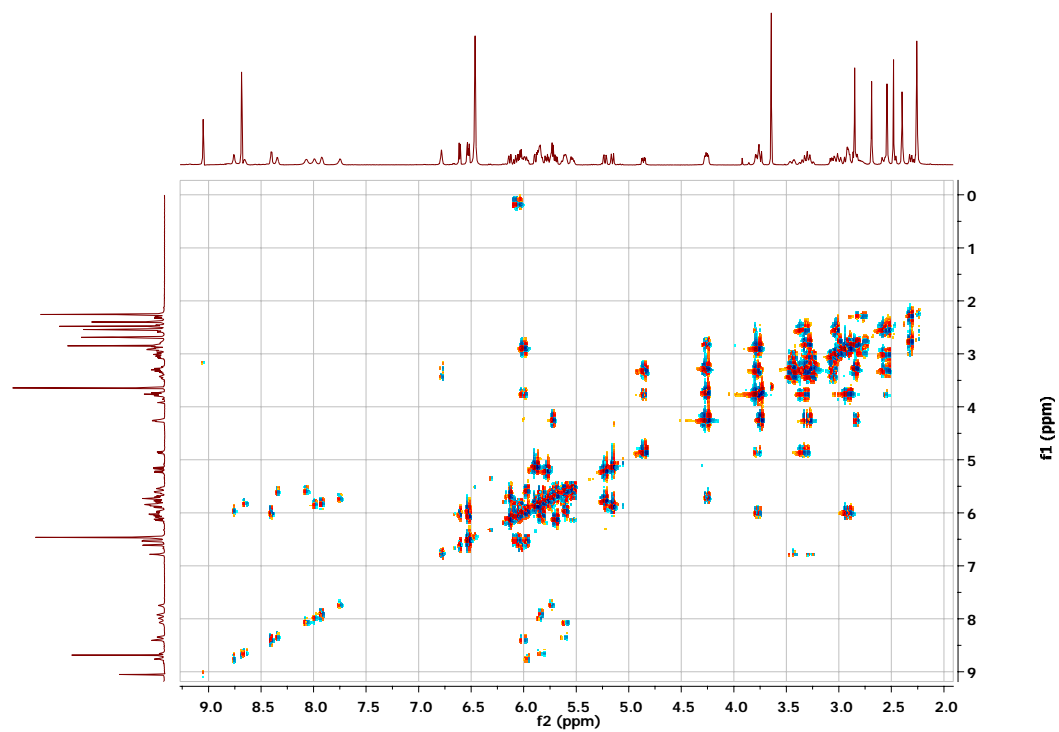

S13 HSQC spectrum of saponin **2**

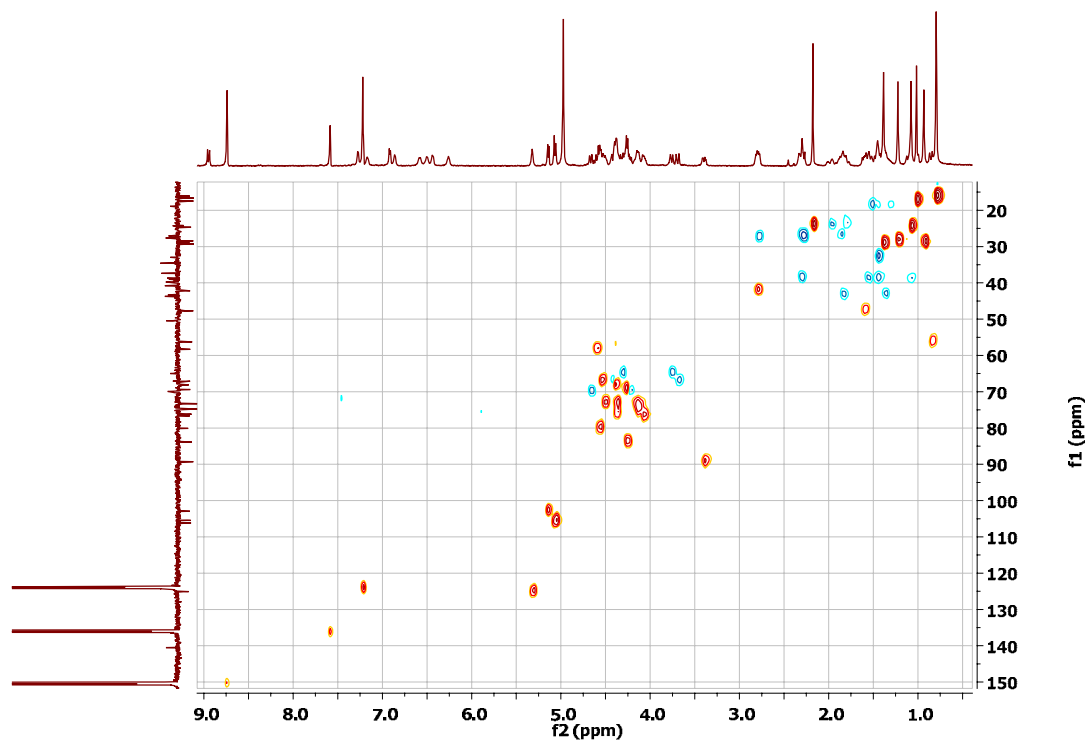

S14 HMBC spectrum of saponin 2

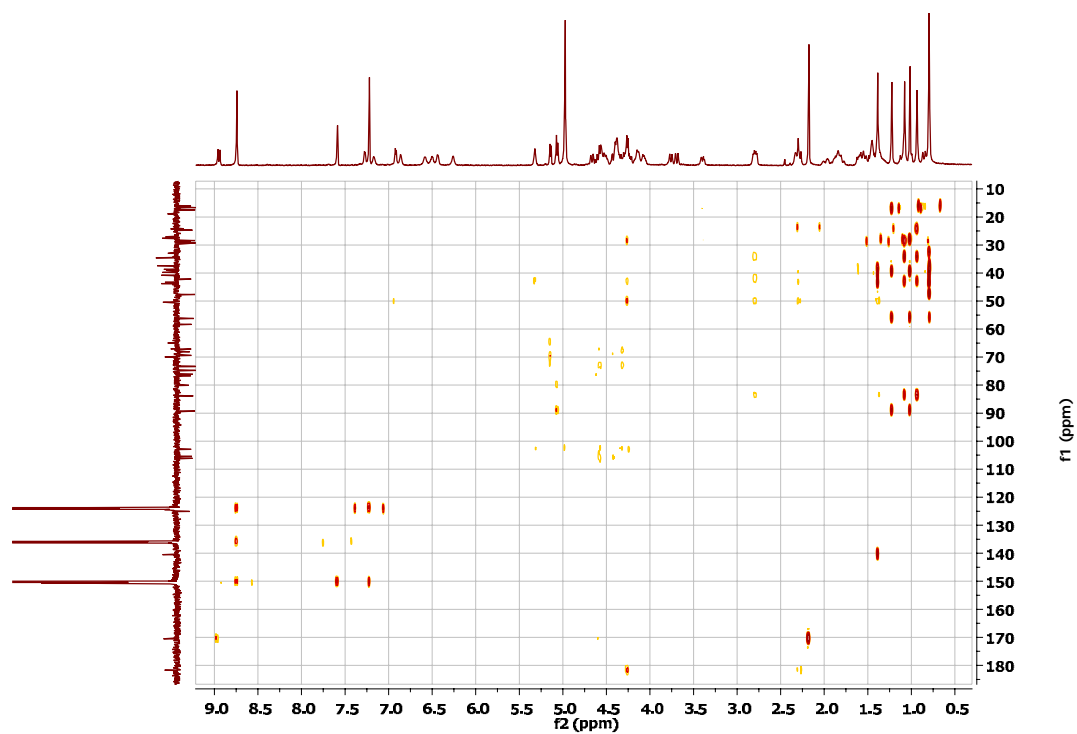

S15 HSQC-TOCSY spectrum of saponin 2

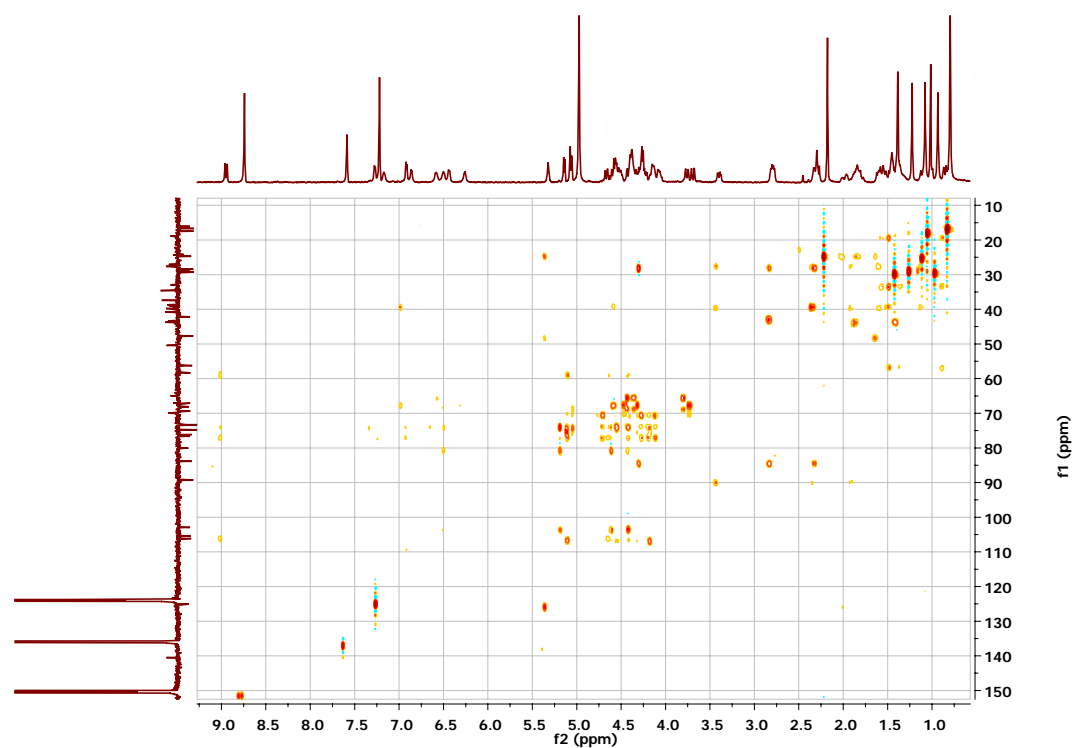

S16  $^1\text{H}$  NMR spectrum (500 MHz in  $\text{C}_5\text{D}_5\text{N}$ ) of saponin **3**

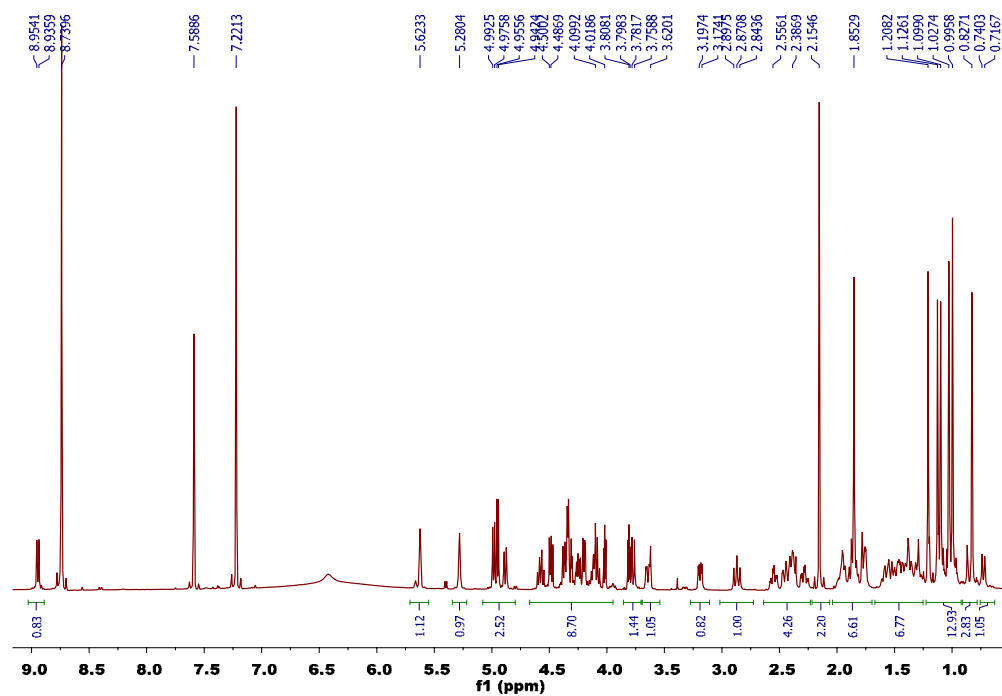

S17  $^{13}\text{C}$  NMR and DEPT135 spectra of saponin **3**

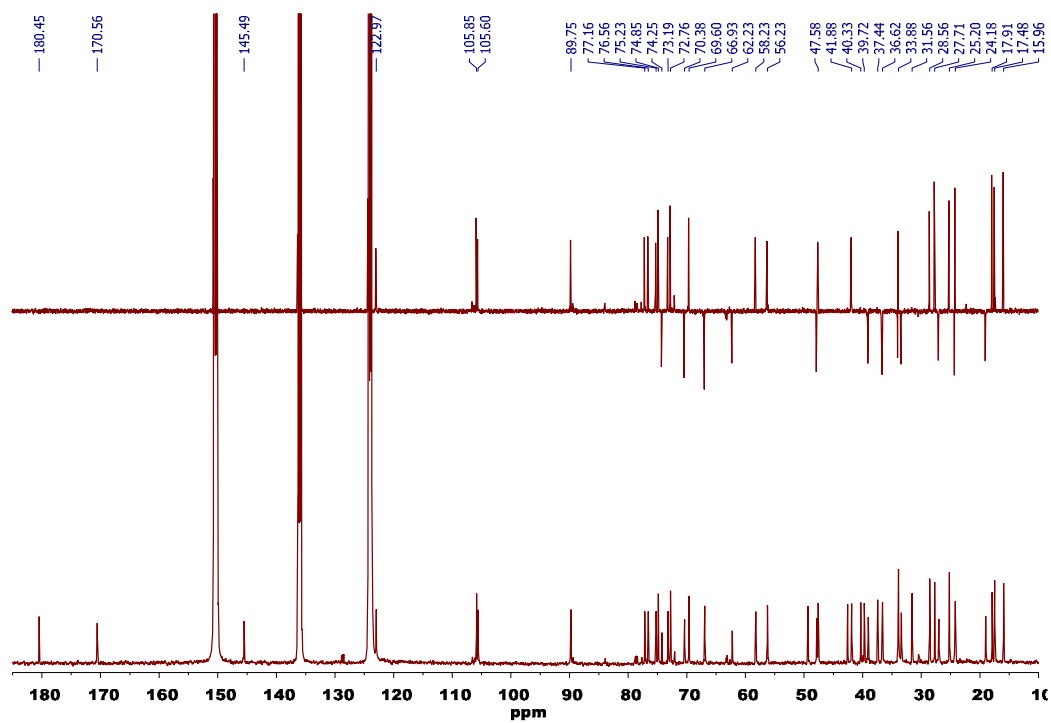

Supplement: NIHMS273946-supplement-1_si_001.pdf [file NIHMS273946-supplement-1_si_001.pdf]
